# Supplementary material
Source: publisher site journal article supplement (https://zse.pensoft.net/article/49989/download/suppl/31/)
Supplement: Supplementary file 1

## Sheet: instructions
	INSTRUCTIONS and TERMS OF USE
	1	This is a morphometric template for species of the Tardigrada Order Echiniscoidea.
	2	The template caluclates the sc ratio and other relative measures only if all measurements required to calculate a ratio are provided (otherwise the ratio cell remains empty, meaning lack of data). The only numbers you need to enter are absolute measurements in micrometres [μm] in sheets "females", "males", "juveniles" and "larvae". If a structure is not measurable leave the cell empty (enetring z…
	3	Sheets "females", "males", "juveniles" and "larvae" automatically calculate basic statistics (number of measurements, range, mean and SD). The table with these statistics is placed after the last (30th) specimen. The summary table can be then copied and pasted directly to MS Word.
	4	If measurements are done on the type series, please enter the holotype in the first column (this way holotype data are automatically copied to the summary table at end of the sheet). If measurements are not done on the type series, you may delete the last two columns in the summary table. You may change specimen/slide names as desired.
	5	If a trait listed is not present in the species you are measuring, remove the entire row (highlight the row, right mouse click, choose "delete").
	6	Data from sheets "females", "males", "juveniles" and "larvae" are automatically copied to the four remaining "stats" sheets. Data in those sheets are arranged for statistical analyses in the majority of statistical software.
	7	If you want to see the formulas behind this template, press Ctrl+` (usually just before "1" on the keyboard). To return to the value view, press Ctrl+` again.
	8	This template can be freely used but each published use must be credited as Morphometric data were handled using the Echiniscoidea ver. 1.3 template available from the Tardigrada Register, www.tardigrada.net/register (Michalczyk & Kaczmarek 2013). The reference is: Michalczyk, Ł. & Kaczmarek, Ł. (2013) The Tardigrada Register: a comprehensive online data repository for tardigrade taxonomy. Journa…
	9	Copyright by Łukasz Michalczyk. Enquires and suggestions: LM@tardigrada.net

## Sheet: general info
	Species		Echiniscus masculinus
	Population		MY.026
	Type series		YES
	Author		Katarzyna Vončina
	Date		08.10.2019

## Sheet: females
SPECIMEN	1 (HOL)		2		3		4		5		6		7		8		9		10		11		12		13		14		15		16		17		18		19		20		21		22		23		24		25
CHARACTER	µm	sc	µm	sc	µm	sc	µm	sc	µm	sc	µm	sc	µm	sc	µm	sc	µm	sc	µm	sc	µm	sc	µm	sc	µm	sc	µm	sc	µm	sc	µm	sc	µm	sc	µm	sc	µm	sc	µm	sc	µm	sc	µm	sc	µm	sc	µm	sc	µm
Body length	178.1	444.14	163.6	438.606	170.5	454.667	174.8	492.394	165.8	431.771	188.7	456.901	175.2	436.908	192.2	439.817	159.4	488.957	183.8	448.293
Scapular plate length	40.1	–	37.3	–	37.5	–	35.5	–	38.4	–	41.3	–	40.1	–	43.7	–	32.6	–	41	–		–		–		–		–		–		–		–		–		–		–		–		–		–		–
Head appendages lengths
Cirrus internus	14.6	36.409			11.9	31.7333	9.7	27.3239	14.9	38.8021	15.5	37.5303	14.3	35.6608	12.3	28.1465	10.2	31.2883	10.3	25.122
Cephalic papilla	6.4	15.9601	6.5	17.4263	6.7	17.8667	6.8	19.1549	6.4	16.6667	7.8	18.8862	7.2	17.9551	6.6	15.103	5.9	18.0982	6.7	16.3415
Cirrus externus	18.8	46.8828	16.9	45.3083			16.7	47.0423	17.2	44.7917	16.5	39.9516			17.9	40.9611	12.3	37.7301	16.1	39.2683
Clava	5.6	13.9651	5.7	15.2815	6.4	17.0667	5	14.0845	5.1	13.2812	4.7	11.3801	5.9	14.7132	5.3	12.1281	4.9	15.0307	6.2	15.122
Cirrus A	33.1	82.5436	35.5	95.1743	30.9	82.4	32.5	91.5493	32.9	85.6771	34.5	83.5351	42.3	105.486	30.4	69.5652	23.3	71.4724	32.8	80
Cirrus A/Body length ratio	0.185851	–	0.216993	–	0.181232	–	0.185927	–	0.198432	–	0.18283	–	0.241438	–	0.158169	–	0.146173	–	0.178455	–		–		–		–		–		–		–		–		–		–		–		–		–		–		–
Body appendages lengths
Cirrus C	15.1	37.6559	17.3	46.3807	20.4	54.4	17.2	48.4507	21.6	56.25	16	38.7409	18	44.8878	15.2	34.7826	10.9	33.4356	14.4	35.122
Cirrus Cd					8	21.3333
Cirrus D	13.8	34.414	21.6	57.9088	17.9	47.7333	16.9	47.6056	14.8	38.5417	18.3	44.3099	15.9	39.6509	17	38.9016	11.2	34.3558	12.1	29.5122
Cirrus Dd	9.7	24.1895	16.8	45.0402	12.9	34.4	14.3	40.2817	12.7	33.0729	16.6	40.1937	12.5	31.1721	9.3	21.2815	2.9	8.89571	9.4	22.9268
Cirrus E	13.6	33.9152	19.1	51.2064	18.4	49.0667	20.7	58.3099	23.3	60.6771	19.1	46.247	18.2	45.3865	18	41.1899	17.9	54.908	17.4	42.439
Spine on leg I length	3.3	8.22943	3.3	8.84718	3	8	3.9	10.9859	3.2	8.33333	3.5	8.47458	3.7	9.22693	3.6	8.23799	3.2	9.81595	3.4	8.29268
Papilla on leg IV length	4.6	11.4713	3.7	9.91957	4	10.6667	3.6	10.1408	4.4	11.4583	5.2	12.5908	4.7	11.7207	4.4	10.0686	4	12.2699	5.3	12.9268
Number of teeth on the collar	9	–	11	–	10	–	11	–	9	–		–	11	–	12	–	8	–	10	–		–		–		–		–		–		–		–		–		–		–		–		–		–		–
Claw 1 heights
Branch	9.7	24.1895			8.8	23.4667	9.7	27.3239	9.5	24.7396	9.7	23.4867	10.7	26.6833			9	27.6074	10.3	25.122
Spur	2.7	6.73317			2.5	6.66667	3	8.4507	2.7	7.03125	3.2	7.74818	3.1	7.73067			2.2	6.74847	3.1	7.56098
Spur/branch height ratio	0.278351	–		–	0.284091	–	0.309278	–	0.284211	–	0.329897	–	0.28972	–		–	0.244444	–	0.300971	–		–		–		–		–		–		–		–		–		–		–		–		–		–		–
Claw 2 heights
Branch	10	24.9377	9.3	24.933			8.7	24.507	9.3	24.2188	10	24.2131	10.4	25.9352	9.4	21.5103	8.4	25.7669	9.5	23.1707
Spur	2.6	6.48379	2.8	7.5067			2.9	8.16901	2.6	6.77083	2.9	7.02179	3	7.4813	3.1	7.09382	2.1	6.44172	3	7.31707
Spur/branch height ratio	0.26	–	0.301075	–		–	0.333333	–	0.27957	–	0.29	–	0.288462	–	0.329787	–	0.25	–	0.315789	–		–		–		–		–		–		–		–		–		–		–		–		–		–		–
Claw 3 heights
Branch	9.9	24.6883	9.3	24.933	9.1	24.2667	9.3	26.1972	8.9	23.1771	9.4	22.7603	10.2	25.4364	9.9	22.6545	8.4	25.7669	10.1	24.6341
Spur	2.9	7.23192	2.4	6.43432	2.5	6.66667	2.2	6.19718	2.4	6.25	2.8	6.77966	2.8	6.98254	3.1	7.09382	2	6.13497	2.7	6.58537
Spur/branch height ratio	0.292929	–	0.258065	–	0.274725	–	0.236559	–	0.269663	–	0.297872	–	0.27451	–	0.313131	–	0.238095	–	0.267327	–		–		–		–		–		–		–		–		–		–		–		–		–		–		–
Claw 4 heights
Branch			11.3	30.2949	9.4	25.0667			11.2	29.1667	10.3	24.9395	11.1	27.6808	10.9	24.9428			12.1	29.5122
Spur			3.2	8.57909	2.3	6.13333			3	7.8125	2.9	7.02179	3.2	7.98005	2.9	6.63616			3.2	7.80488
Spur/branch height ratio		–	0.283186	–	0.244681	–		–	0.267857	–	0.281553	–	0.288288	–	0.266055	–		–	0.264463	–		–		–		–		–		–		–		–		–		–		–		–		–		–		–
[truncated: 19 more columns]

## Sheet: males
SPECIMEN	1 (ALL)		2		3		4		5		6		7		8		9		10		11		12		13		14		15		16		17		18		19		20		21		22		23		24		25
CHARACTER	µm	sc	µm	sc	µm	sc	µm	sc	µm	sc	µm	sc	µm	sc	µm	sc	µm	sc	µm	sc	µm	sc	µm	sc	µm	sc	µm	sc	µm	sc	µm	sc	µm	sc	µm	sc	µm	sc	µm	sc	µm	sc	µm	sc	µm	sc	µm	sc	µm
Body length	167	526.814	154.8	504.235	153.2	469.939	168.4	511.854	157	464.497	170	516.717	166.1	506.402	141.8	467.987	169.1	473.669	158.7	489.815
Scapular plate length	31.7	–	30.7	–	32.6	–	32.9	–	33.8	–	32.9	–	32.8	–	30.3	–	35.7	–	32.4	–		–		–		–		–		–		–		–		–		–		–		–		–		–		–
Head appendages lengths
Cirrus internus	15	47.3186	15.2	49.5114	19.2	58.8957	10.2	31.003	15.3	45.2663	15.6	47.4164	15.9	48.4756	17.1	56.4356	16.4	45.9384	13.5	41.6667
Cephalic papilla	8.6	27.1293	7.8	25.4072	9	27.6074	7.7	23.4043	8.1	23.9645	9.3	28.2675	8.9	27.1341	9.1	30.033	8.7	24.3697	9.2	28.3951
Cirrus externus	17.5	55.205	17.8	57.9805	20	61.3497	19.3	58.6626	16	47.3373	21	63.8298	20	60.9756	20.4	67.3267	18.3	51.2605	17.6	54.321
Clava	6.1	19.2429	6.6	21.4984	6.4	19.6319	7.5	22.7964	6.9	20.4142	6.8	20.6687	7.1	21.6463	6.3	20.7921	7	19.6078	7.1	21.9136
Cirrus A	30	94.6372	28.4	92.5081	36.2	111.043			28.6	84.6154	31.3	95.1368	34.5	105.183	32.7	107.921	33.2	92.9972
Cirrus A/Body length ratio	0.179641	–	0.183463	–	0.236292	–		–	0.182166	–	0.184118	–	0.207706	–	0.230606	–	0.196334	–		–		–		–		–		–		–		–		–		–		–		–		–		–		–		–
Body appendages lengths
Cirrus C	24.7	77.918	21.4	69.7068	22.3	68.4049	25.2	76.5957	23	68.0473	25.6	77.8116	20.9	63.7195	19.9	65.6766	26.9	75.3501	21.4	66.0494
Cirrus D	25	78.8644	19.9	64.8208	17.6	53.9877	24.1	73.2523	25.1	74.2604	20.3	61.7021	24.3	74.0854	21	69.3069	29.7	83.1933	22.7	70.0617
Cirrus Dd			8.7	28.3388
Cirrus Ed	27.7	87.3817	19.9	64.8208	27.1	83.1288	30.5	92.7052	23.5	69.5266	29.6	89.9696	19.4	59.1463	20.5	67.6568	25.3	70.8683	21.2	65.4321
Spine on leg I length	2.8	8.83281	2	6.51466	3.7	11.3497	3.1	9.42249	3.2	9.46746	3.5	10.6383	3.2	9.7561	3.4	11.2211	3.4	9.52381	3.1	9.5679
Papilla on leg IV length	4.1	12.9338	3.8	12.3779	4.8	14.7239	4.3	13.0699	4.8	14.2012	4.9	14.8936	5.3	16.1585			5.2	14.5658	11	33.9506
Number of teeth on the collar	12	–	7	–	11	–	8	–	10	–	8	–	10	–	4.5	–	8	–	4.5	–		–		–		–		–		–		–		–		–		–		–		–		–		–		–
Claw 1 heights
Branch	8.4	26.4984	8.7	28.3388	9.1	27.9141	9.2	27.9635	9	26.6272	9.9	30.0912	9.7	29.5732	9.5	31.3531	10	28.0112	10.7	33.0247
Spur	2.2	6.94006	2.4	7.81759	2.8	8.58896	2.8	8.51064	2.5	7.39645	2.7	8.20669	2.9	8.84146	3	9.90099	3.1	8.68347	2.5	7.71605
Spur/branch height ratio	0.261905	–	0.275862	–	0.307692	–	0.304348	–	0.277778	–	0.272727	–	0.298969	–	0.315789	–	0.31	–	0.233645	–		–		–		–		–		–		–		–		–		–		–		–		–		–		–
Claw 2 heights
Branch	8.6	27.1293	8.9	28.9902			8.7	26.4438	8.4	24.8521	9.6	29.1793	9.6	29.2683	9.6	31.6832	9.4	26.3305	10.4	32.0988
Spur	2.6	8.20189	2.4	7.81759			2.3	6.99088	2.6	7.69231	2.4	7.29483	1.9	5.79268	2.7	8.91089	2.2	6.16246	2.7	8.33333
Spur/branch height ratio	0.302326	–	0.269663	–		–	0.264368	–	0.309524	–	0.25	–	0.197917	–	0.28125	–	0.234043	–	0.259615	–		–		–		–		–		–		–		–		–		–		–		–		–		–		–
Claw 3 heights
Branch	8.7	27.4448	8.5	27.6873			8.5	25.8359	9.2	27.2189	9.7	29.4833	10.1	30.7927	9.5	31.3531	9.5	26.6106
Spur	2.3	7.25552	2.3	7.49186			2.5	7.59878	2.8	8.28402	2.5	7.59878	2.8	8.53659	2.3	7.59076	2.5	7.0028
Spur/branch height ratio	0.264368	–	0.270588	–		–	0.294118	–	0.304348	–	0.257732	–	0.277228	–	0.242105	–	0.263158	–		–		–		–		–		–		–		–		–		–		–		–		–		–		–		–
Claw 4 heights
Branch			10.4	33.8762					9.5	28.1065					10.3	33.9934	10.2	28.5714
Spur			2.7	8.79479					2.8	8.28402					2.8	9.24092	3.1	8.68347
Spur/branch height ratio		–	0.259615	–		–		–	0.294737	–		–		–	0.271845	–	0.303922	–		–		–		–		–		–		–		–		–		–		–		–		–		–		–		–
[truncated: 19 more columns]

## Sheet: juveniles
SPECIMEN	1		2		3		4		5		6		7		8		9		10		11		12		13		14		15		16		17		18		19		20		21		22		23		24		25
CHARACTER	µm	sc	µm	sc	µm	sc	µm	sc	µm	sc	µm	sc	µm	sc	µm	sc	µm	sc	µm	sc	µm	sc	µm	sc	µm	sc	µm	sc	µm	sc	µm	sc	µm	sc	µm	sc	µm	sc	µm	sc	µm	sc	µm	sc	µm	sc	µm	sc	µm
Body length	148.4	431.395	114.9	441.923	125.4	476.806	121.7	460.985	133.7	459.45
Scapular plate length	34.4	–	26	–	26.3	–	26.4	–	29.1	–		–		–		–		–		–		–		–		–		–		–		–		–		–		–		–		–		–		–		–
Head appendages lengths
Cirrus internus	12.3	35.7558	8.5	32.6923	7.9	30.038	7.4	28.0303	7.9	27.1478
Cephalic papilla	6.4	18.6047	5.1	19.6154	4.3	16.3498	5	18.9394	3.8	13.0584
Cirrus externus	14.2	41.2791	10.2	39.2308	10	38.0228	8.8	33.3333
Clava	5.4	15.6977	3.7	14.2308	4.4	16.73	4.1	15.5303	4	13.7457
Cirrus A	28.6	83.1395	21.7	83.4615	19.5	74.1445	21.1	79.9242	23.3	80.0687
Cirrus A/Body length ratio	0.192722	–	0.18886	–	0.155502	–	0.173377	–	0.174271	–		–		–		–		–		–		–		–		–		–		–		–		–		–		–		–		–		–		–		–
Body appendages lengths
Cirrus C	20.3	59.0116	10.1	38.8462	8.1	30.7985	13.2	50	12.9	44.3299
Cirrus D	17.5	50.8721	7.4	28.4615	8.5	32.3194	11	41.6667	13.4	46.0481
Cirrus Dd	16.1	46.8023	9	34.6154	7.1	26.9962	10.1	38.2576	9.6	32.9897
Cirrus E	18	52.3256	11	42.3077	10.8	41.0646	12	45.4545	11.7	40.2062
Spine on leg I length	2.7	7.84884	1.9	7.30769	1.9	7.22433	2.4	9.09091
Papilla on leg IV length	3.7	10.7558	3.3	12.6923	3.2	12.1673	3.8	14.3939	3.2	10.9966
Number of teeth on the collar	8	–	7	–	8	–	8	–	7	–		–		–		–		–		–		–		–		–		–		–		–		–		–		–		–		–		–		–		–
Claw 1 heights
Branch	9.3	27.0349	6.8	26.1538	6.3	23.9544	6.8	25.7576	7.3	25.0859
Spur	2.7	7.84884	2.1	8.07692	1.8	6.84411	1.6	6.06061	1.5	5.15464
Spur/branch height ratio	0.290323	–	0.065	–	0.285714	–	0.235294	–	0.205479	–		–		–		–		–		–		–		–		–		–		–		–		–		–		–		–		–		–		–		–
Claw 2 heights			1.4
Branch			6.5	25	6.1	23.1939	6.5	24.6212	6.8	23.3677
Spur			1.4	5.38462	1.9	7.22433	1.7	6.43939	1.7	5.84192
Spur/branch height ratio		–	0.215385	–	0.311475	–	0.261538	–	0.25	–		–		–		–		–		–		–		–		–		–		–		–		–		–		–		–		–		–		–		–
Claw 3 heights
Branch	8.9	25.8721			6.4	24.3346	6.3	23.8636	6.7	23.0241
Spur	2.5	7.26744			1.8	6.84411	1.8	6.81818	1.7	5.84192
Spur/branch height ratio	0.280899	–		–	0.28125	–	0.285714	–	0.253731	–		–		–		–		–		–		–		–		–		–		–		–		–		–		–		–		–		–		–		–
Claw 4 heights
Branch	9.1	26.4535	6.7	25.7692			7.3	27.6515	7.4	25.4296
Spur	2.8	8.13953	2.2	8.46154			1.8	6.81818	2.1	7.21649
Spur/branch height ratio	0.307692	–	0.328358	–		–	0.246575	–	0.283784	–		–		–		–		–		–		–		–		–		–		–		–		–		–		–		–		–		–		–		–
[truncated: 17 more columns]

## Sheet: larvae
SPECIMEN	1		2		3		4		5		6		7		8		9		10		11		12		13		14		15		16		17		18		19		20		21		22		23		24		25
CHARACTER	µm	sc	µm	sc	µm	sc	µm	sc	µm	sc	µm	sc	µm	sc	µm	sc	µm	sc	µm	sc	µm	sc	µm	sc	µm	sc	µm	sc	µm	sc	µm	sc	µm	sc	µm	sc	µm	sc	µm	sc	µm	sc	µm	sc	µm	sc	µm	sc	µm
Body length
Scapular plate length		–		–		–		–		–		–		–		–		–		–		–		–		–		–		–		–		–		–		–		–		–		–		–		–
Head appendages lengths
Cirrus internus
Cephalic papilla
Cirrus externus
Clava
Cirrus A
Cirrus A/Body length ratio		–		–		–		–		–		–		–		–		–		–		–		–		–		–		–		–		–		–		–		–		–		–		–		–
Body appendages lengths
Cirrus B
Cirrus Bl
Cirrus Bd
Cirrus C
Cirrus Cl
Cirrus Cd
Cirrus D
Cirrus Dl
Cirrus Dd
Cirrus E
Cirrus El
Cirrus Ed
Spine on leg I length
Spine on leg II length
Spine on leg III length
Papilla on leg IV length
Number of teeth on the collar		–		–		–		–		–		–		–		–		–		–		–		–		–		–		–		–		–		–		–		–		–		–		–		–
Notch length
Claw 1 heights
Branch
Spur
Spur/branch height ratio		–		–		–		–		–		–		–		–		–		–		–		–		–		–		–		–		–		–		–		–		–		–		–		–
Claw 2 heights
Branch
Spur
Spur/branch height ratio		–		–		–		–		–		–		–		–		–		–		–		–		–		–		–		–		–		–		–		–		–		–		–		–
Claw 3 heights
Branch
Spur
Spur/branch height ratio		–		–		–		–		–		–		–		–		–		–		–		–		–		–		–		–		–		–		–		–		–		–		–		–
Claw 4 heights
Branch
Spur
Spur/branch height ratio		–		–		–		–		–		–		–		–		–		–		–		–		–		–		–		–		–		–		–		–		–		–		–		–
Third median plate (0 = absent; 1 = present)
[truncated: 17 more columns]

## Sheet: females_stats (μm)
Species	Population	Individual	Body length	Scapular plate length	Cirrus internus	Cephalic papilla	Cirrus externus	Clava	Cirrus A	Cirrus A/Body length ratio	Cirrus C	Cirrus Cd	Cirrus D	Cirrus Dd	Cirrus E	Spine on leg I length	Papilla on leg IV length	Number of teeth on the collar	Claw 1 branch	Claw 1 spur	Claw 1 spur/branch height ratio	Claw 2 branch	Claw 2 spur	Claw 2 spur/branch height ratio	Claw 3 branch	Claw 3 spur	Claw 3 spur/branch height ratio	Claw 4 branch	Claw 4 spur	Claw 4 spur/branch height ratio
Echiniscus masculinus	MY.026	1 (HOL)	178.1	40.1	14.6	6.4	18.8	5.6	33.1	0.185851	15.1		13.8	9.7	13.6	3.3	4.6	9	9.7	2.7	0.278351	10	2.6	0.26	9.9	2.9	0.292929
Echiniscus masculinus	MY.026	2	163.6	37.3		6.5	16.9	5.7	35.5	0.216993	17.3		21.6	16.8	19.1	3.3	3.7	11				9.3	2.8	0.301075	9.3	2.4	0.258065	11.3	3.2	0.283186
Echiniscus masculinus	MY.026	3	170.5	37.5	11.9	6.7		6.4	30.9	0.181232	20.4	8	17.9	12.9	18.4	3	4	10	8.8	2.5	0.284091				9.1	2.5	0.274725	9.4	2.3	0.244681
Echiniscus masculinus	MY.026	4	174.8	35.5	9.7	6.8	16.7	5	32.5	0.185927	17.2		16.9	14.3	20.7	3.9	3.6	11	9.7	3	0.309278	8.7	2.9	0.333333	9.3	2.2	0.236559
Echiniscus masculinus	MY.026	5	165.8	38.4	14.9	6.4	17.2	5.1	32.9	0.198432	21.6		14.8	12.7	23.3	3.2	4.4	9	9.5	2.7	0.284211	9.3	2.6	0.27957	8.9	2.4	0.269663	11.2	3	0.267857
Echiniscus masculinus	MY.026	6	188.7	41.3	15.5	7.8	16.5	4.7	34.5	0.18283	16		18.3	16.6	19.1	3.5	5.2		9.7	3.2	0.329897	10	2.9	0.29	9.4	2.8	0.297872	10.3	2.9	0.281553
Echiniscus masculinus	MY.026	7	175.2	40.1	14.3	7.2		5.9	42.3	0.241438	18		15.9	12.5	18.2	3.7	4.7	11	10.7	3.1	0.28972	10.4	3	0.288462	10.2	2.8	0.27451	11.1	3.2	0.288288
Echiniscus masculinus	MY.026	8	192.2	43.7	12.3	6.6	17.9	5.3	30.4	0.158169	15.2		17	9.3	18	3.6	4.4	12				9.4	3.1	0.329787	9.9	3.1	0.313131	10.9	2.9	0.266055
Echiniscus masculinus	MY.026	9	159.4	32.6	10.2	5.9	12.3	4.9	23.3	0.146173	10.9		11.2	2.9	17.9	3.2	4	8	9	2.2	0.244444	8.4	2.1	0.25	8.4	2	0.238095
Echiniscus masculinus	MY.026	10	183.8	41	10.3	6.7	16.1	6.2	32.8	0.178455	14.4		12.1	9.4	17.4	3.4	5.3	10	10.3	3.1	0.300971	9.5	3	0.315789	10.1	2.7	0.267327	12.1	3.2	0.264463
Echiniscus masculinus	MY.026	11
Echiniscus masculinus	MY.026	12
Echiniscus masculinus	MY.026	13
Echiniscus masculinus	MY.026	14
Echiniscus masculinus	MY.026	15
Echiniscus masculinus	MY.026	16
Echiniscus masculinus	MY.026	17
Echiniscus masculinus	MY.026	18
Echiniscus masculinus	MY.026	19
Echiniscus masculinus	MY.026	20
Echiniscus masculinus	MY.026	21
Echiniscus masculinus	MY.026	22
Echiniscus masculinus	MY.026	23
Echiniscus masculinus	MY.026	24
Echiniscus masculinus	MY.026	25
Echiniscus masculinus	MY.026	26
Echiniscus masculinus	MY.026	27
Echiniscus masculinus	MY.026	28
Echiniscus masculinus	MY.026	29
Echiniscus masculinus	MY.026	30

## Sheet: females_stats (sc)
Species	Population	Individual	Body length	Cirrus internus	Cephalic papilla	Cirrus externus	Clava	Cirrus A	Cirrus C	Cirrus Cd	Cirrus D	Cirrus Dd	Cirrus E	Spine on leg I length	Papilla on leg IV length	Claw 1 branch	Claw 1 spur	Claw 2 branch	Claw 2 spur	Claw 3 branch	Claw 3 spur	Claw 4 branch	Claw 4 spur
Echiniscus masculinus	MY.026	1 (HOL)	444.14	36.409	15.9601	46.8828	13.9651	82.5436	37.6559		34.414	24.1895	33.9152	8.22943	11.4713	24.1895	6.73317	24.9377	6.48379	24.6883	7.23192
Echiniscus masculinus	MY.026	2	438.606		17.4263	45.3083	15.2815	95.1743	46.3807		57.9088	45.0402	51.2064	8.84718	9.91957			24.933	7.5067	24.933	6.43432	30.2949	8.57909
Echiniscus masculinus	MY.026	3	454.667	31.7333	17.8667		17.0667	82.4	54.4	21.3333	47.7333	34.4	49.0667	8	10.6667	23.4667	6.66667			24.2667	6.66667	25.0667	6.13333
Echiniscus masculinus	MY.026	4	492.394	27.3239	19.1549	47.0423	14.0845	91.5493	48.4507		47.6056	40.2817	58.3099	10.9859	10.1408	27.3239	8.4507	24.507	8.16901	26.1972	6.19718
Echiniscus masculinus	MY.026	5	431.771	38.8021	16.6667	44.7917	13.2812	85.6771	56.25		38.5417	33.0729	60.6771	8.33333	11.4583	24.7396	7.03125	24.2188	6.77083	23.1771	6.25	29.1667	7.8125
Echiniscus masculinus	MY.026	6	456.901	37.5303	18.8862	39.9516	11.3801	83.5351	38.7409		44.3099	40.1937	46.247	8.47458	12.5908	23.4867	7.74818	24.2131	7.02179	22.7603	6.77966	24.9395	7.02179
Echiniscus masculinus	MY.026	7	436.908	35.6608	17.9551		14.7132	105.486	44.8878		39.6509	31.1721	45.3865	9.22693	11.7207	26.6833	7.73067	25.9352	7.4813	25.4364	6.98254	27.6808	7.98005
Echiniscus masculinus	MY.026	8	439.817	28.1465	15.103	40.9611	12.1281	69.5652	34.7826		38.9016	21.2815	41.1899	8.23799	10.0686			21.5103	7.09382	22.6545	7.09382	24.9428	6.63616
Echiniscus masculinus	MY.026	9	488.957	31.2883	18.0982	37.7301	15.0307	71.4724	33.4356		34.3558	8.89571	54.908	9.81595	12.2699	27.6074	6.74847	25.7669	6.44172	25.7669	6.13497
Echiniscus masculinus	MY.026	10	448.293	25.122	16.3415	39.2683	15.122	80	35.122		29.5122	22.9268	42.439	8.29268	12.9268	25.122	7.56098	23.1707	7.31707	24.6341	6.58537	29.5122	7.80488
Echiniscus masculinus	MY.026	11
Echiniscus masculinus	MY.026	12
Echiniscus masculinus	MY.026	13
Echiniscus masculinus	MY.026	14
Echiniscus masculinus	MY.026	15
Echiniscus masculinus	MY.026	16
Echiniscus masculinus	MY.026	17
Echiniscus masculinus	MY.026	18
Echiniscus masculinus	MY.026	19
Echiniscus masculinus	MY.026	20
Echiniscus masculinus	MY.026	21
Echiniscus masculinus	MY.026	22
Echiniscus masculinus	MY.026	23
Echiniscus masculinus	MY.026	24
Echiniscus masculinus	MY.026	25
Echiniscus masculinus	MY.026	26
Echiniscus masculinus	MY.026	27
Echiniscus masculinus	MY.026	28
Echiniscus masculinus	MY.026	29
Echiniscus masculinus	MY.026	30

## Sheet: males_stats (μm)
Species	Population	Individual	Body length	Scapular plate length	Cirrus internus	Cephalic papilla	Cirrus externus	Clava	Cirrus A	Cirrus A/Body length ratio	Cirrus C	Cirrus D	Cirrus Dd	Cirrus Ed	Spine on leg I length	Papilla on leg IV length	Number of teeth on the collar	Claw 1 branch	Claw 1 spur	Claw 1 spur/branch height ratio	Claw 2 branch	Claw 2 spur	Claw 2 spur/branch height ratio	Claw 3 branch	Claw 3 spur	Claw 3 spur/branch height ratio	Claw 4 branch	Claw 4 spur	Claw 4 spur/branch height ratio
Echiniscus masculinus	MY.026	1 (ALL)	167	31.7	15	8.6	17.5	6.1	30	0.179641	24.7	25		27.7	2.8	4.1	12	8.4	2.2	0.261905	8.6	2.6	0.302326	8.7	2.3	0.264368
Echiniscus masculinus	MY.026	2	154.8	30.7	15.2	7.8	17.8	6.6	28.4	0.183463	21.4	19.9	8.7	19.9	2	3.8	7	8.7	2.4	0.275862	8.9	2.4	0.269663	8.5	2.3	0.270588	10.4	2.7	0.259615
Echiniscus masculinus	MY.026	3	153.2	32.6	19.2	9	20	6.4	36.2	0.236292	22.3	17.6		27.1	3.7	4.8	11	9.1	2.8	0.307692
Echiniscus masculinus	MY.026	4	168.4	32.9	10.2	7.7	19.3	7.5			25.2	24.1		30.5	3.1	4.3	8	9.2	2.8	0.304348	8.7	2.3	0.264368	8.5	2.5	0.294118
Echiniscus masculinus	MY.026	5	157	33.8	15.3	8.1	16	6.9	28.6	0.182166	23	25.1		23.5	3.2	4.8	10	9	2.5	0.277778	8.4	2.6	0.309524	9.2	2.8	0.304348	9.5	2.8	0.294737
Echiniscus masculinus	MY.026	6	170	32.9	15.6	9.3	21	6.8	31.3	0.184118	25.6	20.3		29.6	3.5	4.9	8	9.9	2.7	0.272727	9.6	2.4	0.25	9.7	2.5	0.257732
Echiniscus masculinus	MY.026	7	166.1	32.8	15.9	8.9	20	7.1	34.5	0.207706	20.9	24.3		19.4	3.2	5.3	10	9.7	2.9	0.298969	9.6	1.9	0.197917	10.1	2.8	0.277228
Echiniscus masculinus	MY.026	8	141.8	30.3	17.1	9.1	20.4	6.3	32.7	0.230606	19.9	21		20.5	3.4		4.5	9.5	3	0.315789	9.6	2.7	0.28125	9.5	2.3	0.242105	10.3	2.8	0.271845
Echiniscus masculinus	MY.026	9	169.1	35.7	16.4	8.7	18.3	7	33.2	0.196334	26.9	29.7		25.3	3.4	5.2	8	10	3.1	0.31	9.4	2.2	0.234043	9.5	2.5	0.263158	10.2	3.1	0.303922
Echiniscus masculinus	MY.026	10	158.7	32.4	13.5	9.2	17.6	7.1			21.4	22.7		21.2	3.1	11	4.5	10.7	2.5	0.233645	10.4	2.7	0.259615
Echiniscus masculinus	MY.026	11
Echiniscus masculinus	MY.026	12
Echiniscus masculinus	MY.026	13
Echiniscus masculinus	MY.026	14
Echiniscus masculinus	MY.026	15
Echiniscus masculinus	MY.026	16
Echiniscus masculinus	MY.026	17
Echiniscus masculinus	MY.026	18
Echiniscus masculinus	MY.026	19
Echiniscus masculinus	MY.026	20
Echiniscus masculinus	MY.026	21
Echiniscus masculinus	MY.026	22
Echiniscus masculinus	MY.026	23
Echiniscus masculinus	MY.026	24
Echiniscus masculinus	MY.026	25
Echiniscus masculinus	MY.026	26
Echiniscus masculinus	MY.026	27
Echiniscus masculinus	MY.026	28
Echiniscus masculinus	MY.026	29
Echiniscus masculinus	MY.026	30

## Sheet: males_stats (sc)
Species	Population	Individual	Body length	Cirrus internus	Cephalic papilla	Cirrus externus	Clava	Cirrus A	Cirrus C	Cirrus D	Cirrus Dd	Cirrus Ed	Spine on leg I length	Papilla on leg IV length	Claw 1 branch	Claw 1 spur	Claw 2 branch	Claw 2 spur	Claw 3 branch	Claw 3 spur	Claw 4 branch	Claw 4 spur
Echiniscus masculinus	MY.026	1 (ALL)	526.814	47.3186	27.1293	55.205	19.2429	94.6372	77.918	78.8644		87.3817	8.83281	12.9338	26.4984	6.94006	27.1293	8.20189	27.4448	7.25552
Echiniscus masculinus	MY.026	2	504.235	49.5114	25.4072	57.9805	21.4984	92.5081	69.7068	64.8208	28.3388	64.8208	6.51466	12.3779	28.3388	7.81759	28.9902	7.81759	27.6873	7.49186	33.8762	8.79479
Echiniscus masculinus	MY.026	3	469.939	58.8957	27.6074	61.3497	19.6319	111.043	68.4049	53.9877		83.1288	11.3497	14.7239	27.9141	8.58896
Echiniscus masculinus	MY.026	4	511.854	31.003	23.4043	58.6626	22.7964		76.5957	73.2523		92.7052	9.42249	13.0699	27.9635	8.51064	26.4438	6.99088	25.8359	7.59878
Echiniscus masculinus	MY.026	5	464.497	45.2663	23.9645	47.3373	20.4142	84.6154	68.0473	74.2604		69.5266	9.46746	14.2012	26.6272	7.39645	24.8521	7.69231	27.2189	8.28402	28.1065	8.28402
Echiniscus masculinus	MY.026	6	516.717	47.4164	28.2675	63.8298	20.6687	95.1368	77.8116	61.7021		89.9696	10.6383	14.8936	30.0912	8.20669	29.1793	7.29483	29.4833	7.59878
Echiniscus masculinus	MY.026	7	506.402	48.4756	27.1341	60.9756	21.6463	105.183	63.7195	74.0854		59.1463	9.7561	16.1585	29.5732	8.84146	29.2683	5.79268	30.7927	8.53659
Echiniscus masculinus	MY.026	8	467.987	56.4356	30.033	67.3267	20.7921	107.921	65.6766	69.3069		67.6568	11.2211		31.3531	9.90099	31.6832	8.91089	31.3531	7.59076	33.9934	9.24092
Echiniscus masculinus	MY.026	9	473.669	45.9384	24.3697	51.2605	19.6078	92.9972	75.3501	83.1933		70.8683	9.52381	14.5658	28.0112	8.68347	26.3305	6.16246	26.6106	7.0028	28.5714	8.68347
Echiniscus masculinus	MY.026	10	489.815	41.6667	28.3951	54.321	21.9136		66.0494	70.0617		65.4321	9.5679	33.9506	33.0247	7.71605	32.0988	8.33333
Echiniscus masculinus	MY.026	11
Echiniscus masculinus	MY.026	12
Echiniscus masculinus	MY.026	13
Echiniscus masculinus	MY.026	14
Echiniscus masculinus	MY.026	15
Echiniscus masculinus	MY.026	16
Echiniscus masculinus	MY.026	17
Echiniscus masculinus	MY.026	18
Echiniscus masculinus	MY.026	19
Echiniscus masculinus	MY.026	20
Echiniscus masculinus	MY.026	21
Echiniscus masculinus	MY.026	22
Echiniscus masculinus	MY.026	23
Echiniscus masculinus	MY.026	24
Echiniscus masculinus	MY.026	25
Echiniscus masculinus	MY.026	26
Echiniscus masculinus	MY.026	27
Echiniscus masculinus	MY.026	28
Echiniscus masculinus	MY.026	29
Echiniscus masculinus	MY.026	30

[truncated: 4 more sheets: juveniles_stats (μm), juvenles_stats (sc), larvae_stats (μm), larvae_stats (sc)]
